# Supplementary material
Source: PubMed Central journal article supplement (PMC7296449)
Supplement: jamainternmed-180-1108-s001.pdf [file jamainternmed-180-1108-s001.pdf]

## Supplementary Online Content

Hilal T, Gonzalez-Velez M, Prasad V. Limitations in clinical trials leading to anticancer drug approvals by the US Food and Drug Administration. *JAMA Intern Med*. Published online June 15, 2020. doi:10.1001/jamainternmed.2020.2250

**eTable 1.** Clinical trials with suboptimal control arms

**eTable 2.** Clinical trials with crossover errors

This supplementary material has been provided by the authors to give readers additional information about their work.

eTable 1. Clinical trials with suboptimal control arms

| Trial (Accrual Dates)                  | Indication                                                                 | Investigational Agent      | Control                                              | Comment                                                                                                                                                                             |
|----------------------------------------|----------------------------------------------------------------------------|----------------------------|------------------------------------------------------|-------------------------------------------------------------------------------------------------------------------------------------------------------------------------------------|
| ALCANZA (August 2012 – July 2015)      | pcALCL, or CD30-expressing mycosis fungoides who received prior therapy    | Brentuximab vedotin        | Physician's choice (oral methotrexate or bexarotene) | Vorinostat and romidepsin used (in US). HDAC inhibitors not chosen because not EMA-approved in cutaneous T-cell lymphoma. Restricted choice.                                        |
| ALCYONE (February 2015 – July 2016)    | Newly diagnosed multiple myeloma that are transplant ineligible            | Daratumumab (+ VMP)        | VMP (bortezomib, melphalan, prednisone)              | VMP is not used in the U.S. Immunomodulatory agent is SOC in newly diagnosed MM, but not utilized in this trial.                                                                    |
| ASCEND-4 (August 2013 – May 2015)      | Metastatic ALK-positive NSCLC, first-line                                  | Ceritinib                  | Platinum-based therapy                               | Crizotinib is SOC and approved in 2011 by FDA prior to trial enrollment.                                                                                                            |
| AUGMENT (February 2014 – January 2017) | Follicular lymphoma and marginal zone, previously treated (with rituximab) | Lenalidomide (+ rituximab) | Placebo (+ rituximab)                                | Single-agent rituximab not adequate. 85% previously exposed to rituximab. 60% received 1 line of chemoimmunotherapy before enrollment on trial. Chemotherapy with rituximab is SOC. |
| BFORE (July 2014 – August 2015)        | First-line chronic phase CML                                               | Bosutinib                  | Imatinib                                             | Nilotinib and dasatinib have demonstrated better MMR compared to imatinib. Not allowed in control arm                                                                               |
| CLARINET (June 2006 – April 2013)      | Unresectable or metastatic GEP-NETs, nonfunctional                         | Lanreotide                 | Placebo                                              | Compared to placebo; octreotide used with RCT data, everolimus sunitinib used in this setting to control tumor growth                                                               |

|                                          |                                                                                               |                                            |                                                                     |                                                                                                                                                                  |
|------------------------------------------|-----------------------------------------------------------------------------------------------|--------------------------------------------|---------------------------------------------------------------------|------------------------------------------------------------------------------------------------------------------------------------------------------------------|
| CLL14 (August 2015 – August 2016)        | Previously untreated CLL with comorbidities                                                   | Venetoclax (+ obinutuzumab)                | Chlorambucil + obinutuzumab                                         | Other SOC options not allowed (e.g. BR). Restricted choice in control arm.                                                                                       |
| COMPLEMENT 2 (March 2009 – January 2012) | Relapsed CLL                                                                                  | Ofatumumab (+ FC)                          | FC (fludarabine and cyclophosphamide)                               | Rituximab not allowed in control arm. Data from 2005 showed benefit of FCR in frontline and relapsed CLL.                                                        |
| EMBRACA (October 2013 – April 2017)      | Germline BRCA-mutated HER2-negative metastatic breast cancer who have been treated with chemo | Talazoparib                                | Physician choice (capecitabine, eribulin, gemcitabine, vinorelbine) | Platinum not allowed in control arm as a physician choice.                                                                                                       |
| iNNOVATE (July 2014 – January 2016)      | Waldenstrom's macroglobulinemia                                                               | Ibrutinib (+ rituximab)                    | Rituximab                                                           | Single-agent rituximab is an option but other chemoimmunotherapy options are SOC based on phase 2 data that were not allowed.                                    |
| MAIA (March 2015 – January 2017)         | Newly diagnosed multiple myeloma that are transplant ineligible                               | Daratumumab (+ lenalidomide/dexamethasone) | Lenalidomide/dexamethasone                                          | Rd is suboptimal front line therapy for transplant ineligible MM. RVD-lite was adopted as SOC for these patients in 2014/2015.                                   |
| OlympiAD (April 2014 – November 2015)    | Germline BRCA-mutated HER2-negative metastatic breast cancer who have been treated with chemo | Olaparib                                   | Physicians' choice of chemotherapy (not platinum)                   | Platinum not allowed as SOC physician choice                                                                                                                     |
| PROSPER (November 2013 – June 2017)      | Non-metastatic castration-resistant prostate cancer                                           | Enzalutamide                               | Placebo                                                             | Bicalutamide used in this space. Patients on bicalutamide had to discontinue before enrollment.                                                                  |
| SPARTAN (October 2013 – December 2016)   | Non-metastatic castration-resistant prostate cancer                                           | Apalutamide                                | Placebo                                                             | Bicalutamide used in this space. Patients on bicalutamide had to discontinue before enrollment.                                                                  |
| TOURMALINE-MM1 (August 2012 – May 2014)  | Myeloma after at least one prior therapy                                                      | Ixazomib (+ lenalidomide/dexamethasone)    | Placebo (+ lenalidomide/dexamethasone)                              | Bortezomib-based therapy (doublet or triplet with alkylator) recommended for relapsed myeloma. Repeat induction therapy is also standard if >6 months remission. |

|                                               |                                                                                                                 |                                 |                              |                                                                                                                                                                             |
|-----------------------------------------------|-----------------------------------------------------------------------------------------------------------------|---------------------------------|------------------------------|-----------------------------------------------------------------------------------------------------------------------------------------------------------------------------|
| Study 0761-010 (December 2012 – January 2016) | Relapsed or refractory mycosis fungoides (MF) or Sézary syndrome (SS) after at least one prior systemic therapy | Mogamulizumab-kpkc              | Vorinostat                   | Other systemic therapies not allowed (including bexarotene, methotrexate).                                                                                                  |
| IMpassion130 (June 2015 – May 2017)           | First-line metastatic TNBC                                                                                      | Atezolizumab (+ nab-paclitaxel) | Placebo (+ nab-paclitaxel)   | No established SOC. Many single agent chemo.                                                                                                                                |
| iLLUMINATE (October 2014 – October 2015)      | Treatment naïve CLL, >65 years or younger with coexisting conditions                                            | Ibrutinib (+ obinutuzumab)      | Chlorambucil (+obinutuzumab) | BR (bendamustine + rituximab) not allowed in control arm, more commonly used for older patients. Restricting choice of control therapy.                                     |
| DUO (January 2014 – December 2015)            | Relapsed/refractory CLL or SLL after 2 prior therapies                                                          | Duvelisib                       | Ofatumomab                   | No previous BTK inhibitor allowed. Ofatumumab not standard therapy in third or fourth line treatment of CLL (especially del 17p who were 22% of pts)                        |
| RADIANT-4 (April 2012 – August 2013)          | Progressive, nonfunctional GI and lung NET                                                                      | Everolimus                      | Placebo + BSC                | SOC is octreotide; patients were randomized to placebo and were not able to receive octreotide with placebo                                                                 |
| Keynote-054 (July 2015 – January 2018)        | Adjuvant melanoma after complete resection                                                                      | Pembrolizumab                   | Placebo                      | Ipilimumab approved in 2015, likely after the protocol was written, but CheckMate-238 comparing nivolumab to ipilimumab accrued during same time period.                    |
| ARAMIS (September 2014 – March 2018)          | Nonmetastatic castration-resistant prostate cancer                                                              | Darolutamide                    | Placebo                      | Bicalutamide and other AR antagonists used in this space. Standard bicalutamide was discontinued before trial enrollment in both arms.                                      |
| BRIGHT AML 1003 (January 2014 – January 2017) | Newly diagnosed AML in 75 or older or who have comorbidities                                                    | Glasdegib (+ LDAC)              | LDAC                         | LDAC is viewed as inferior to HMAs in the US. HMAs were not allowed in control arm                                                                                          |
| JGDG (October 2010 – January 2013)            | Soft tissue sarcoma for which anthracycline is appropriate                                                      | Olaratumab (+ doxorubicin)      | Doxorubicin                  | Doublet chemo is commonly used (anthracycline with ifosfamide) and shown to be superior in terms of PFS to single-agent doxorubicin. Primary endpoint of this trial was PFS |
| METEOR (August 2013 – November 2014)          | Advanced RCC in following one line of therapy                                                                   | Cabozantinib                    | Everolimus                   | Axitinib superior to sorafenib in second line setting. Everolimus not proven to be                                                                                          |

|                                             |                                                                                |                                            |                                 |                                                                                                                                                                                                        |
|---------------------------------------------|--------------------------------------------------------------------------------|--------------------------------------------|---------------------------------|--------------------------------------------------------------------------------------------------------------------------------------------------------------------------------------------------------|
|                                             |                                                                                |                                            |                                 | superior to active agent in second-line setting.                                                                                                                                                       |
| POLLUX (June 2014 – July 2015)              | Myeloma after at least one prior therapy                                       | Daratumumab (+ lenalidomide/dexamethasone) | Lenalidomide/dexamethasone      | Only 15% previously received combination of bortezomib/lenalidomide. 55% previously received IMiD. Re-using VRD in control arm would be optimal.                                                       |
| MURANO (March 2014 – September 2015)        | CLL with or without 17p deletion, who have received at least 1 line of therapy | Venetoclax                                 | Bendamustine/rituximab          | Most patients (95%) previously treated with alkylating agent. 78% previously treated with anti-CD20 antibody. Obinutuzumab/ chlorambucil not allowed. Restricted choice.                               |
| RESONATE (June 2012 – April 2013)           | Previously treated CLL                                                         | Ibrutinib                                  | Ofatumumab                      | Many options considered SOC. Single-agent ofatumumab in relapsed disease is sub-optimal.                                                                                                               |
| RESONATE-2 (March 2013 – March 2015)        | First-line CLL                                                                 | Ibrutinib                                  | Chlorambucil                    | Chemoimmunotherapy is standard of care for first-line CLL 1 year prior to trial enrollment.                                                                                                            |
| Keynote-045 (November 2014 – November 2015) | Metastatic urothelial carcinoma who progress on platinum therapy               | Pembrolizumab                              | Paclitaxel/docetaxel/vinflunine | Phase 2 data for nab-paclitaxel or pemetrexed, NCCN listing. Not allowed as physician choice. Restricted choice.                                                                                       |
| GADOLIN (April 2010 – September 2014)       | Follicular lymphoma who relapsed after/refractory to rituximab                 | Obinutuzumab (+ bendamustine)              | Bendamustine                    | 50% of patients received 1 previous line of therapy. 30% received 2 lines of therapy. Single-agent bendamustine in control arm is not standard for those patients, even if progressed within 6 months. |

eTable 2. Clinical trials with crossover errors

| Trial (Accrual Dates)                  | Indication                                                                 | Investigational Agent                      | Control                    | Protocol Specified Crossover ? | Crossover Comment                                                                                                                                                                          |
|----------------------------------------|----------------------------------------------------------------------------|--------------------------------------------|----------------------------|--------------------------------|--------------------------------------------------------------------------------------------------------------------------------------------------------------------------------------------|
| AUGMENT (February 2014 – January 2017) | Follicular lymphoma and marginal zone, previously treated (with rituximab) | Lenalidomide (+ rituximab)                 | Placebo (+ rituximab)      | No                             | There is data on established efficacy of lenalidomide in second-line setting (Leonard. CALGB 50401. JCO 2012)                                                                              |
| BFORE (July 2014 – August 2015)        | First-line chronic phase CML                                               | Bosutinib                                  | Imatinib                   | No                             | Bosutinib approved in second-line for imatinib resistant CML.                                                                                                                              |
| MAIA (March 2015 – January 2017)       | Newly diagnosed multiple myeloma that are transplant ineligible            | Daratumumab (+ lenalidomide/dexamethasone) | Lenalidomide/dexamethasone | No                             | Daratumumab showed efficacy in relapsed myeloma in 2015 and POLLUX published in 2016 showed DRd better than Rd in relapsed MM.                                                             |
| ALEX (August 2014 – January 2016)      | ALK-positive metastatic NSCLC, first-line                                  | Alectinib                                  | Crizotinib                 | No                             | Alectinib FDA approved in 2015 for second-line NSCLC after crizotinib. In some countries, patients may receive alectinib in second-line setting, but off-protocol (no mention of numbers). |

|                                               |                                                                                   |               |                  |     |                                                                                                                                                        |
|-----------------------------------------------|-----------------------------------------------------------------------------------|---------------|------------------|-----|--------------------------------------------------------------------------------------------------------------------------------------------------------|
| SOLO1<br>(September 2013 – March 2015)        | First-line maintenance for BRCA-mutated ovarian cancer in CR or PR after platinum | Olaparib      | Placebo          | No  | Crossover desirable. Olaparib proven benefit and approved by FDA in December 2014 for advanced BRCA-mutated ovarian cancer.                            |
| CheckMate-238<br>(March 2015 – October 2015)  | Adjuvant melanoma with lymph nodes                                                | Nivolumab     | Ipilimumab       | No  | Crossover to nivolumab upon progression of disease should be allowed. Nivolumab approved for metastatic melanoma in front-line                         |
| Keynote-006<br>(September 2013 – March 2014)  | Unresectable or metastatic melanoma                                               | Pembrolizumab | Ipilimumab       | No  | Crossover desirable. Pembrolizumab approved for second-line advanced melanoma in September 2014. Double crossover would have been appropriate as well. |
| Keynote-042<br>(October 2014 – February 2018) | First-line NSCLC (PD-L1 $\geq 1\%$ )                                              | Pembrolizumab | Platinum-doublet | No  | Crossover desirable. Pembrolizumab proven benefit in later line, approved in October 2015                                                              |
| CLARINET (June 2006 – April 2013)             | Unresectable or metastatic GEP-NETs, nonfunctional                                | Lanreotide    | Placebo          | Yes | Crossover not desirable. Lanreotide approved for acromegaly. No FDA approval. Octreotide was used and patients could receive octreotide.               |

|                                                  |                                                                                                                 |                                                               |                                                                                                                                                 |     |                                                                                                                                                                                                                                  |
|--------------------------------------------------|-----------------------------------------------------------------------------------------------------------------|---------------------------------------------------------------|-------------------------------------------------------------------------------------------------------------------------------------------------|-----|----------------------------------------------------------------------------------------------------------------------------------------------------------------------------------------------------------------------------------|
| Study 0761-010<br>(December 2012 – January 2016) | Relapsed or refractory mycosis fungoides (MF) or Sézary syndrome (SS) after at least one prior systemic therapy | Mogamulizumab-kpkc                                            | Vorinostat                                                                                                                                      | Yes | 73% (136/186) crossed over to mogamulizumab. No randomized data to establish mogamulizumab efficacy or FDA approval based on single-arm data.                                                                                    |
| AETHERA (April 2010 – September 2012)            | cHL after ASCT consolidation treatment                                                                          | Brentuximab vedotin                                           | Placebo                                                                                                                                         | Yes | Crossover not desirable. Brentuximab vedotin approved for progressive disease after ASCT in August 2011, more than 1 year after trial enrollment, based on single-arm data.                                                      |
| AURELIA (October 2009 – April 2011)              | Platinum-resistant, recurrent ovarian cancer                                                                    | Bevacizumab (+ paclitaxel or pegylated liposomal doxorubicin) | Chemotherapy (pegylated liposomal doxorubicin, weekly paclitaxel, or topotecan)                                                                 | Yes | Crossover not desirable. No proven benefit of bevacizumab in platinum-resistant ovarian cancer during trial period. No RCT or FDA approval in second or third-line. There is a phase II trial showing efficacy (PMID: 18024865). |
| SELECT (August 2011 – October 2012)              | Metastatic differentiated thyroid cancer                                                                        | Lenvatinib                                                    | Placebo                                                                                                                                         | Yes | Crossover not desirable. Lenvatinib not approved in radioiodine-refractory disease. No RCT prior SELECT showing efficacy in later line therapy.                                                                                  |
| RESPONSE (November 2010 – February 2013)         | PV who had inadequate response to hydroxyurea                                                                   | Ruxolitinib                                                   | Hydroxyurea, interferon or pegylated interferon, pipobroman, anagrelide, immunomodulators such as lenalidomide or thalidomide, or no medication | Yes | Crossover not desirable. Ruxolitinib not FDA approved, but positive phase 2 data. 86% crossed over to ruxolitinib around week 32.                                                                                                |



|                                                    |                                                           |                      |            |                                                              |                                                                                                                                                                                                                  |
|----------------------------------------------------|-----------------------------------------------------------|----------------------|------------|--------------------------------------------------------------|------------------------------------------------------------------------------------------------------------------------------------------------------------------------------------------------------------------|
| SPARTAN<br>(October 2013 –<br>December 2016)       | Non-metastatic castration-resistant<br>prostate cancer    | Apalutamide          | Placebo    | Yes                                                          | No approval of apalutamide in early<br>CSPR. 19% crossed over to<br>apalutamide.                                                                                                                                 |
| CheckMate-214<br>(October 2014 –<br>February 2016) | First-line intermediate or poor-risk RCC                  | Nivolumab/ipilimumab | Sunitinib  | No (but<br>amendment<br>after<br>primary<br>endpoint<br>met) | Nivolumab approved in second line<br>setting in November 2015 based on<br>phase 3 RCT. Should have allowed<br>crossover from the start. No mention<br>of post progression therapy in<br>appendix in control arm. |
| DUO (January<br>2014 –<br>December 2015)           | Relapsed/refractory CLL or SLL after 2<br>prior therapies | Duvelisib            | Ofatumumab | Yes<br>(double)                                              | Duvelisib efficacy not confirmed and<br>crossing patients in control arm to<br>duvelisib exposed them to therapy<br>that was not proven to be superior<br>to other standards.                                    |
